# Supplementary material for: A new modification of an old framework: Hofmann layers with unusual tetracyanidometallate groups
Source: Royal Society of Chemistry journal article supplement (doi:10.1039/c1dt11183c), 2011-01-01
Supplement: c1dt11183c.pdf [file c1dt11183c.pdf]

## Supporting Information

### A new modification of an old framework: Hofmann layers with unusual tetracyanidometallate groups

Tony D. Keene, Michael J. Murphy, Jason R. Price, David J. Price and Cameron J. Kepert

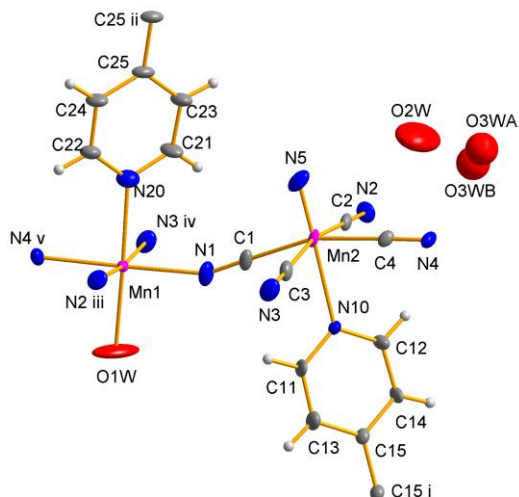

**Figure S1** Asymmetric unit and selected symmetry equivalents of **2**. Thermal ellipsoids are at the 50% probability level.

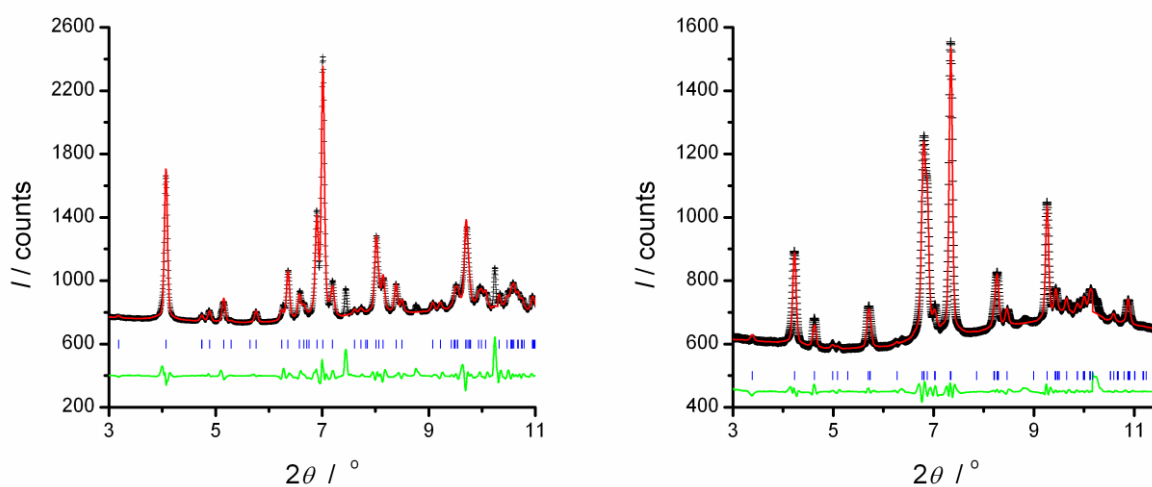

**Figure S2** a) Le Bail profile fit to synchrotron PXRD data ( $\lambda = 60941 \text{ \AA}$ ) for **1** at 100 K ( $R_p = 0.978 \%$ ,  $wR_p = 1.537 \%$  and  $\chi^2 = 0.203$ ;  $a = 7.3775 \text{ \AA}$ ,  $b = 17.1715 \text{ \AA}$ ,  $c = 14.3011 \text{ \AA}$ ,  $\beta = 91.5856^\circ$ ,  $V = 1811.0 \text{ \AA}^3$ ) and b) at 500 K ( $a = 7.5419 \text{ \AA}$ ,  $b = 16.5071 \text{ \AA}$ ,  $c = 13.1994 \text{ \AA}$ ,  $\beta = 90.100^\circ$ ,  $V = 1643.3 \text{ \AA}^3$ ).

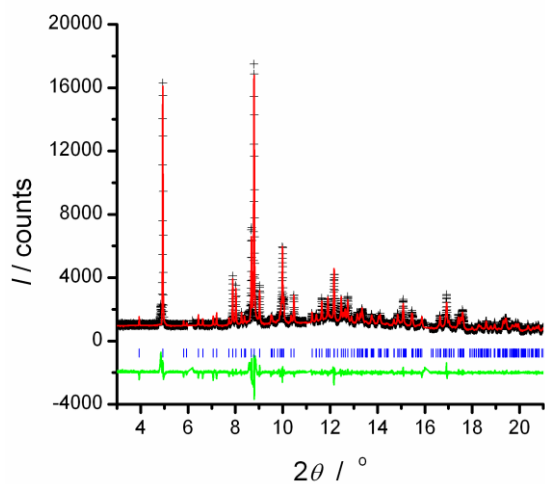

**Figure S3** Le Bail profile fit to synchrotron PXRD data ( $\lambda = 0.75246 \text{ \AA}$ ) for **2** at 140 K.  $a = 7.249 \text{ \AA}$ ,  $b = 17.456 \text{ \AA}$ ,  $c = 14.029 \text{ \AA}$ ,  $\beta = 91.625^\circ$ ,  $V = 1774.6 \text{ \AA}^3$ .

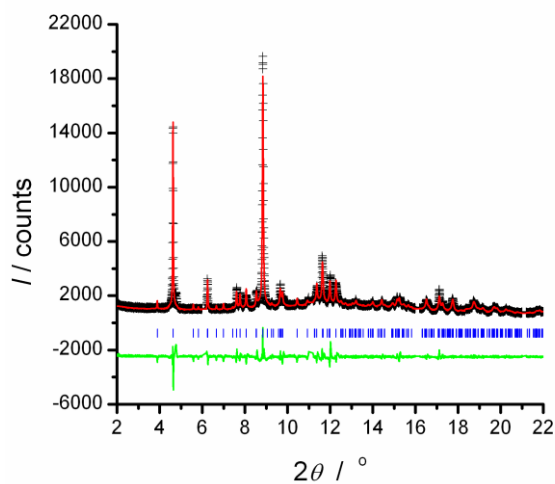

**Figure S4** Le Bail profile fit to synchrotron PXRD data ( $\lambda = 0.75246 \text{ \AA}$ ) for **3** at 140 K.  $a = 7.318 \text{ \AA}$ ,  $b = 17.989 \text{ \AA}$ ,  $c = 13.860 \text{ \AA}$ ,  $\beta = 90.345^\circ$ ,  $V = 1824.5 \text{ \AA}^3$ .

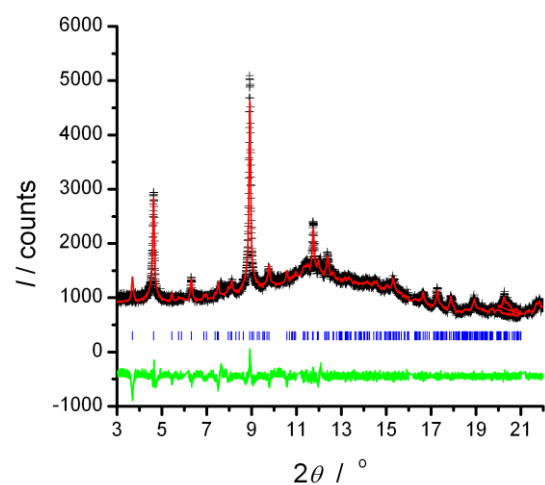

**Figure S5** Le Bail profile fit to synchrotron PXRD data ( $\lambda = 0.75246 \text{ \AA}$ ) for **4** at 140 K.  $a = 7.345 \text{ \AA}$ ,  $b = 18.615 \text{ \AA}$ ,  $c = 15.028 \text{ \AA}$ ,  $\beta = 91.251^\circ$ ,  $V = 2054.2 \text{ \AA}^3$ .

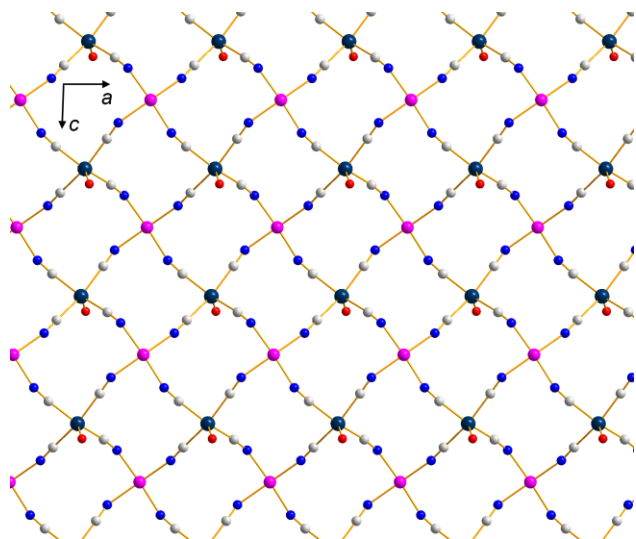

**Figure S6** Mn[MoO(CN)<sub>4</sub>] Hofmann layer viewed down the *b*-axis in **1**

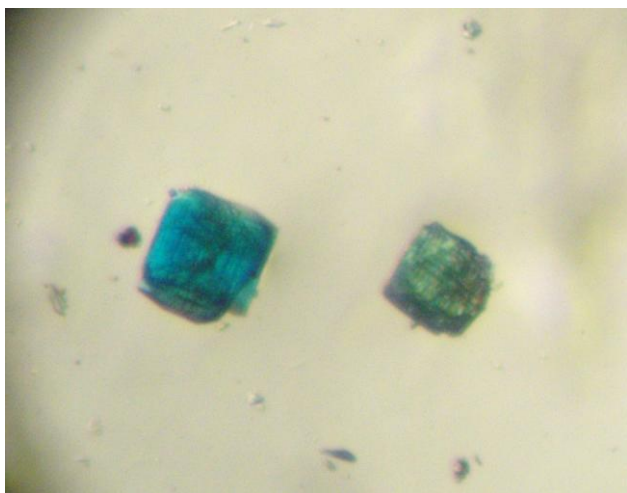

**Figure S7** Dichroism of crystals of **5**.

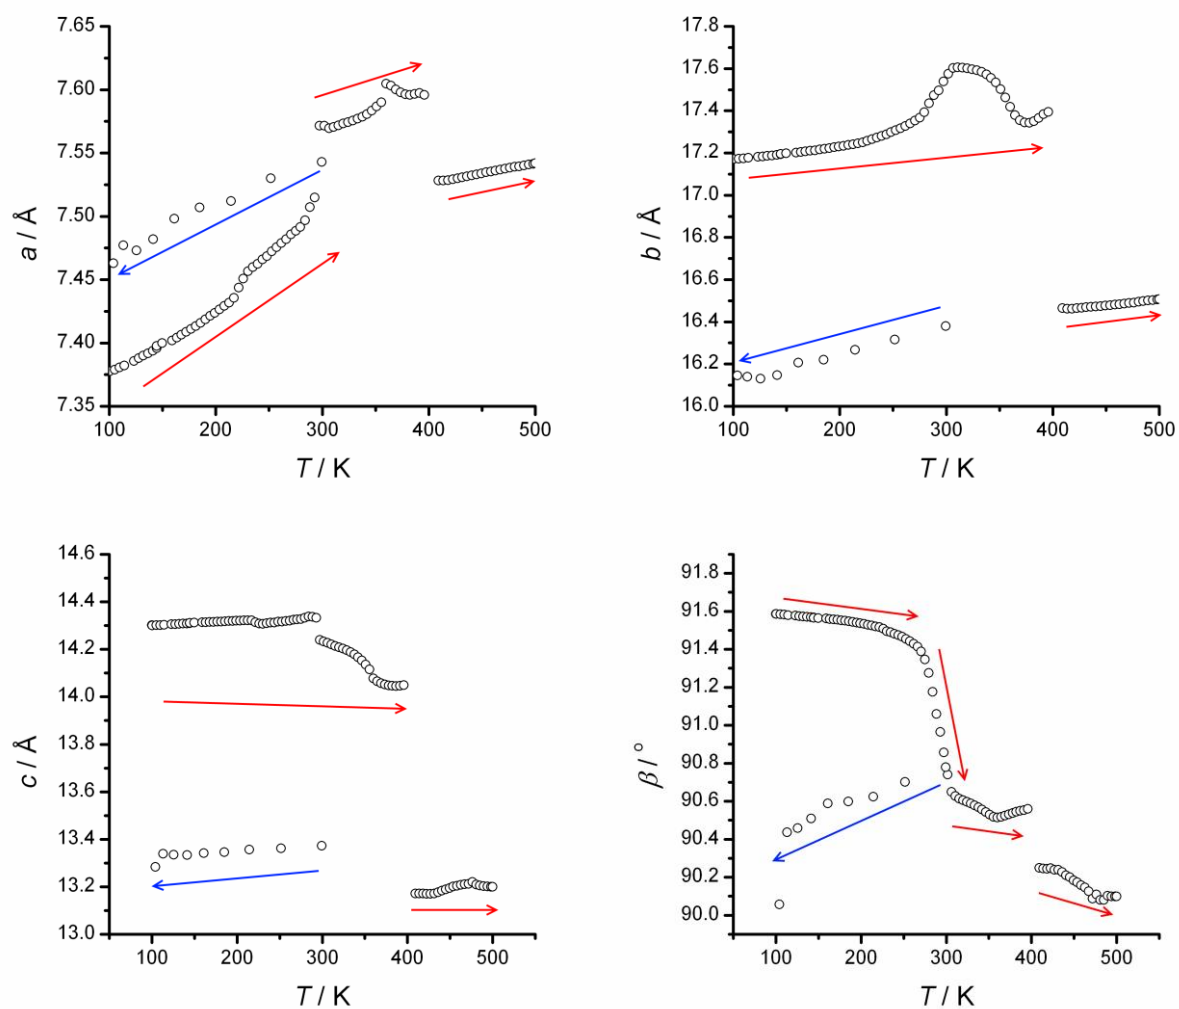

**Figure S8** Thermal variation in cell axes and angles in **1**. Red arrows represent heating, blue cooling.

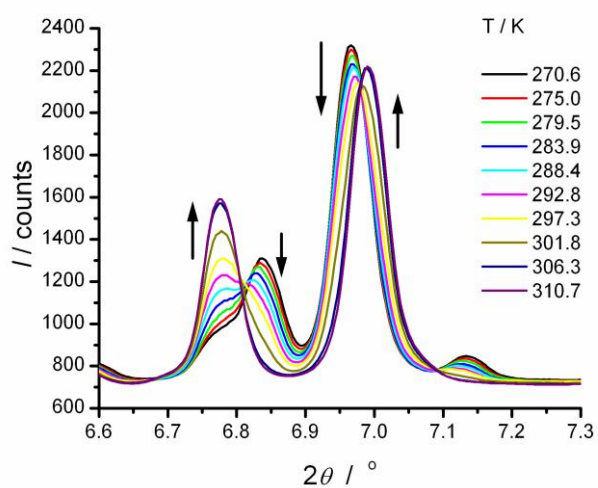

**Figure S9** Phase change in **1** between 275 and 306 K. Arrows represent direction of movement with increasing temperature.

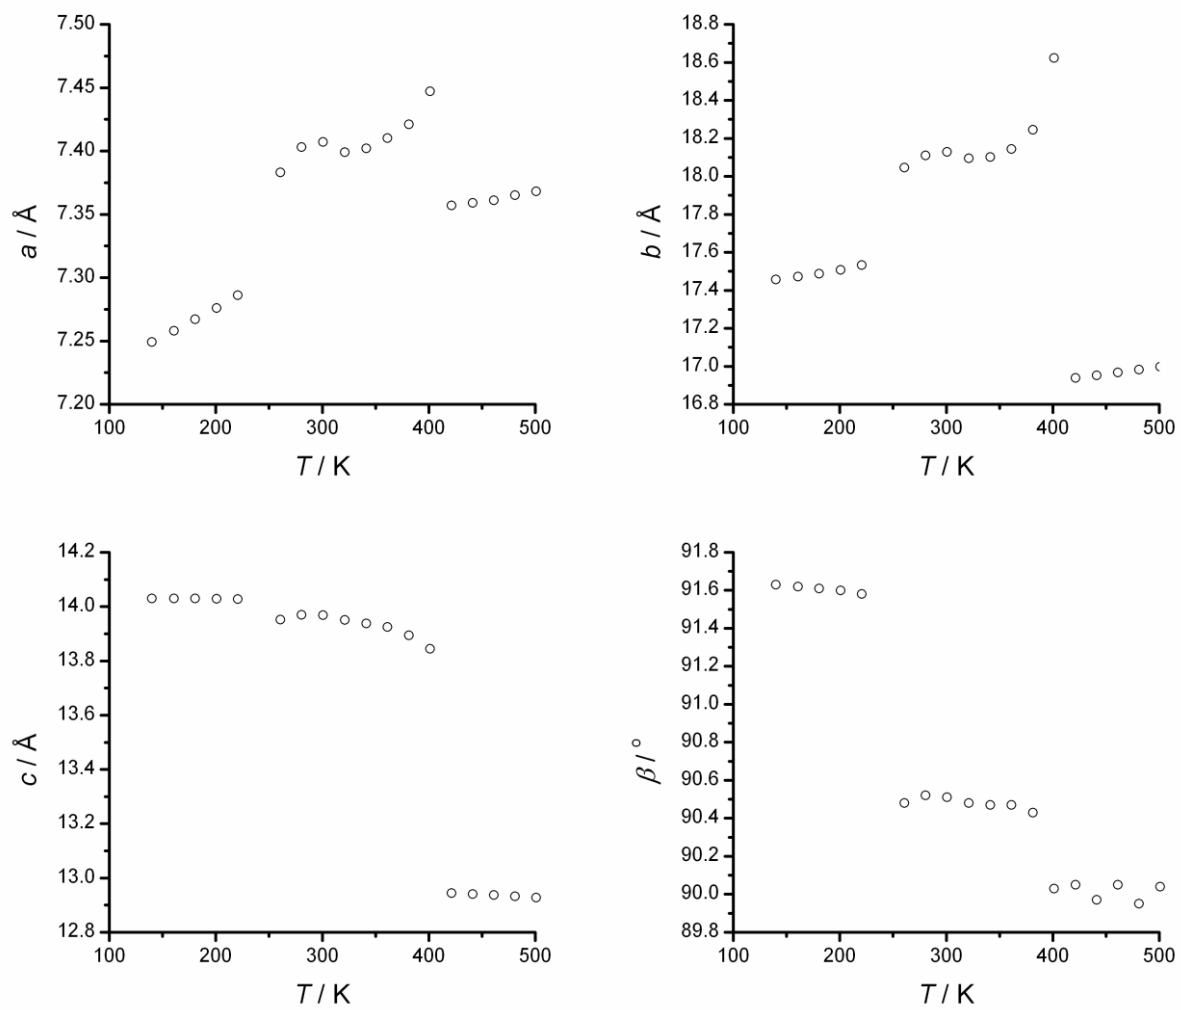

**Figure S10** Thermal variation in cell axes and angles in **2**

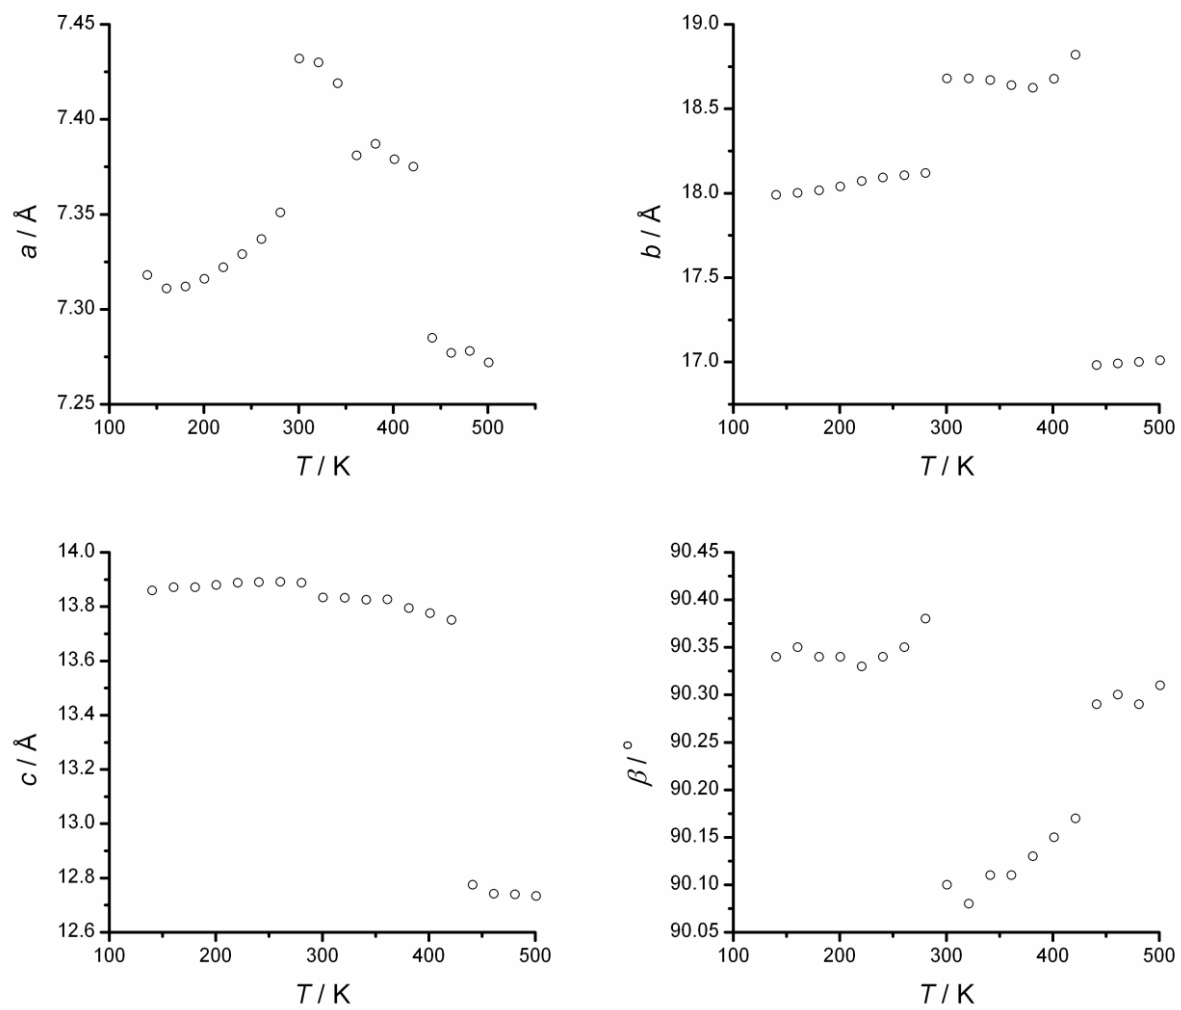

**Figure S11** Thermal variation in cell axes and angles in **3**

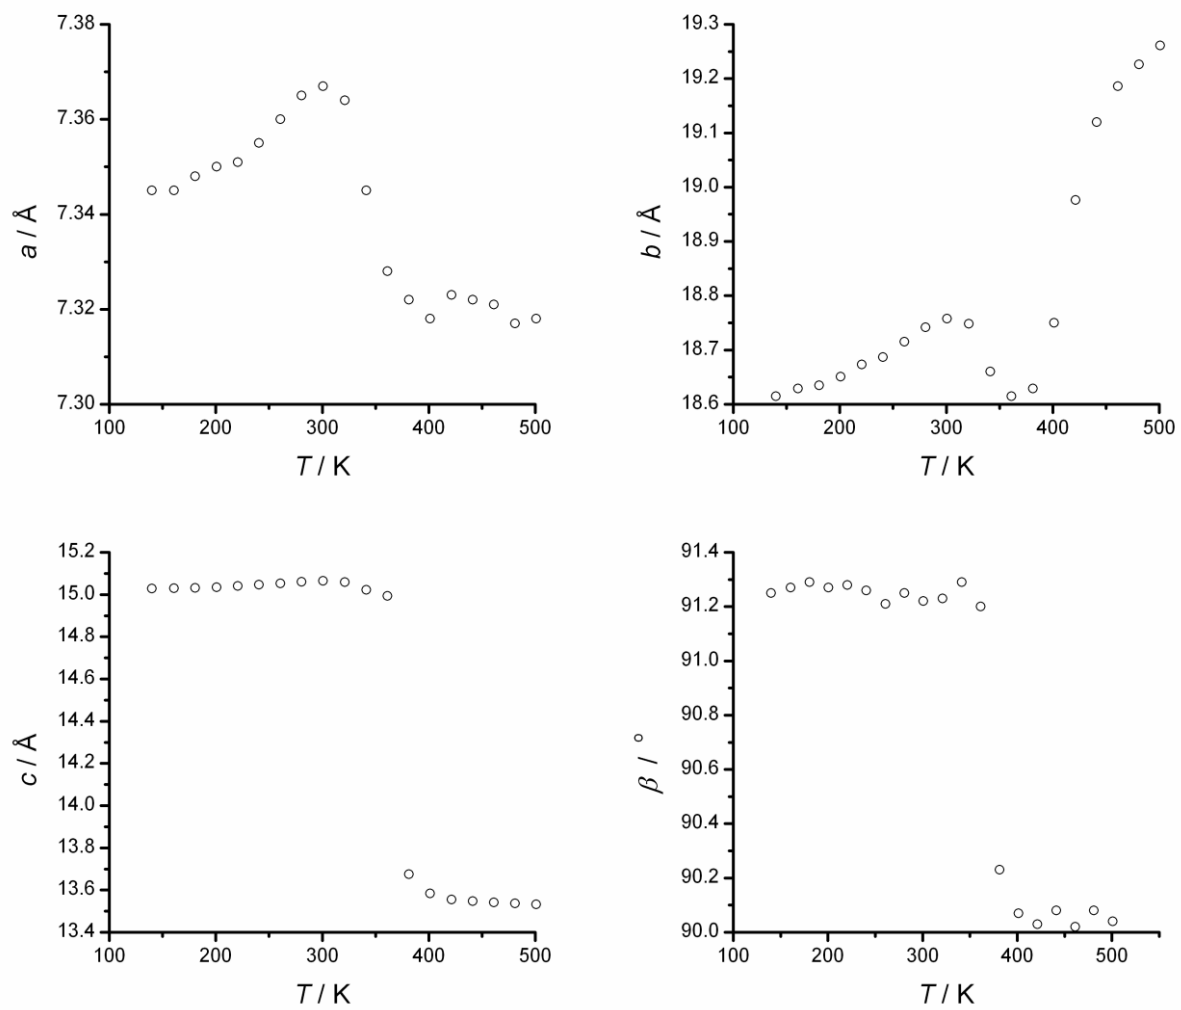

**Figure S12** Variation in cell axes and angles in **4**

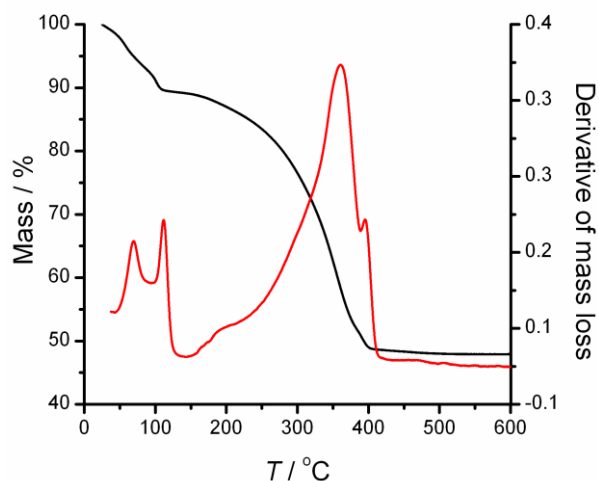

**Figure S13** Thermogravimetric analysis plot for **1**. Three mass losses are seen: 22 – 88 °C, centred at 56 °C, corresponding to a loss of two waters (actual 7.2%; calc. 7.5%); 88 – 112 °C, centred at 100 °C, corresponding to the loss of one water (actual 3.2 %; calc. 3.7 %) and a gradual loss from 150 – 400 °C corresponding to the decomposition of the framework into a mixture of  $\text{MnO}_2$  and  $\text{MoO}_2$  (actual 41.7%; calc. 44.1%).

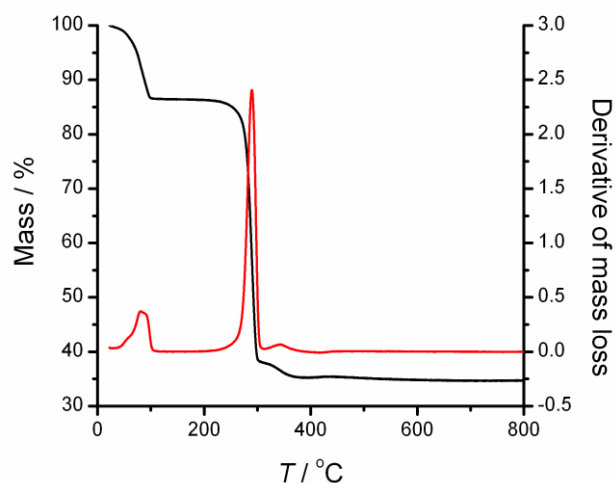

**Figure S14** Thermogravimetric analysis plot for **2**. Two mass losses are seen: 45 – 99 °C, centred at 80 °C, corresponding to the loss of three waters (actual 13.5%; calc. 12.3%) and the decomposition of the framework to  $\text{Mn}_2\text{O}_3$  beginning around 210 °C (actual 51.2%, calc. 51.6%).



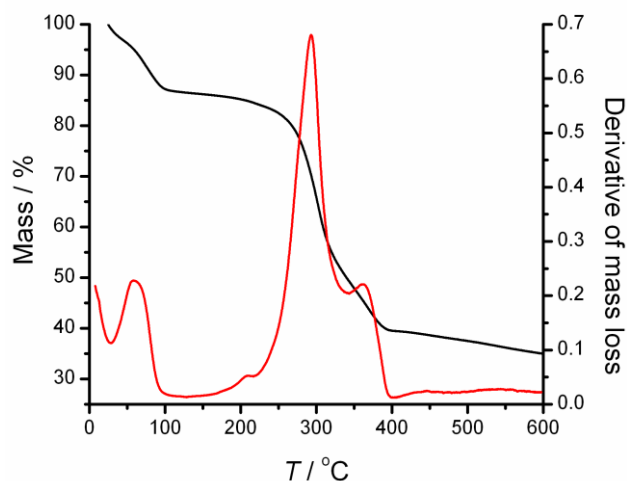

**Figure S15** Thermogravimetric analysis plot for **3**. Two mass losses are seen: 22 – 106 °C, centred at 75 °C, corresponding to the loss of three waters (actual 13.1%; calc. 12.3%) and the decomposition of the framework to  $\text{Fe}_2\text{O}_3$  and  $\text{Mn}_2\text{O}_3$  beginning around 190 °C (actual 51.5%; calc. 51.8%).

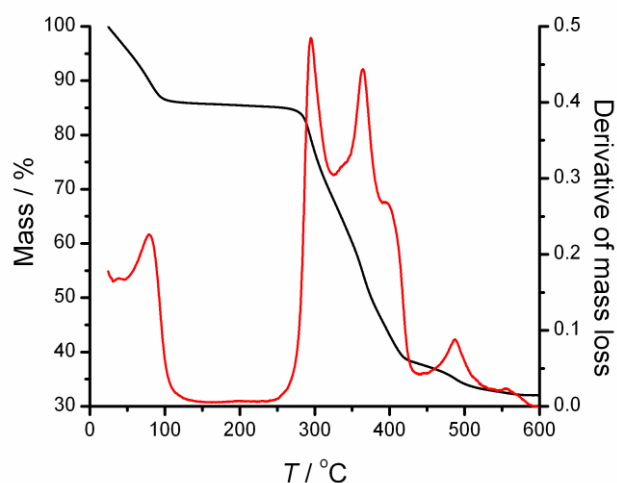

**Figure S16** Thermogravimetric analysis plot for **4**. Two mass losses are seen: 22 – 109 °C, centred at 74 °C, corresponding to the loss of three waters (actual 13.1%; calc. 12.3%) and the decomposition of the framework to  $\text{CoO}$  and  $\text{Mn}_2\text{O}_3$  beginning above 260 °C (actual 51.2%; calc. 52.9%).

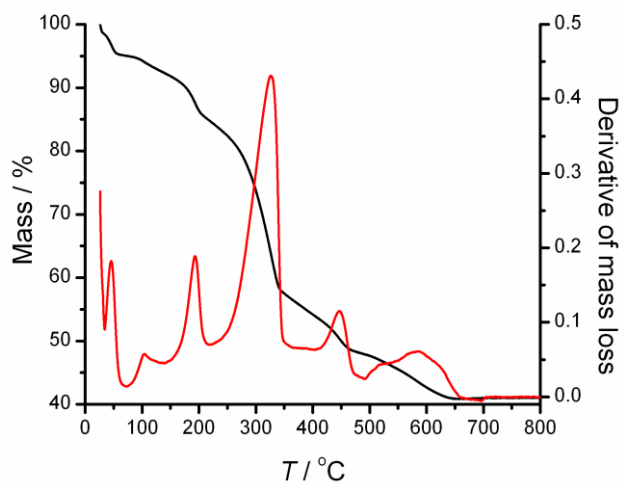

**Figure S17** Thermogravimetric analysis plot for **5**. Several mass losses are seen: 22 – 57 °C, corresponding to loss of MeOH, centred at 46 °C (actual 4.9%; calc. 5.6%); 79 – 140 °C corresponding to loss of 2 H<sub>2</sub>O, centred at 104 °C (actual 8.4%; calc. 11.8%). After this come four indistinct mass losses, finishing with a total end value of 41.1%. corresponding to the formation of a mixture of Mn<sub>2</sub>O<sub>3</sub> and MoO<sub>2</sub>.
